# Supplementary material
Source: ML conference proceedings conference paper supplement (https://openaccess.thecvf.com/content/WACV_2020/html/Albiero_Does_Face_Recognition_WACV_2020_paper.html)
Supplement: Supplementary file 1 [file Albiero_Does_Face_Recognition_WACV_2020_supplemental.pdf]

### Supplementary Material - Illustration of Issues with VGGFace2 Age Templates

This supplementary material is based on the VGGFace2 documentation<sup>1</sup>. Based on the AgeTemplates info, the first subject number in the age templates is n000654. Based on the IdentityMeta info, subject n000654 is an actress named Anne Schedeen. Figure 1 shows the 20 images in the age templates for n000654 [6], along with actual identities as best we have been able to determine them. Among the 20 images, only 5 or 6 are of Anne Schedeen. The person seen most in these templates is Anne Meara, co-star of Schedeen in "ALF". Matching between the two mature templates would likely generate a higher score than matching between the younger templates, as there is a smaller number of subjects in the mature templates.

While we have only investigated in detail the first subject in the age templates, the problems are not unique to this subject. We conclude that results presented for mature and young templates by Cao et al. [6] may not be reliable, and that a cleaning procedure may not leave enough images for a template style analysis.

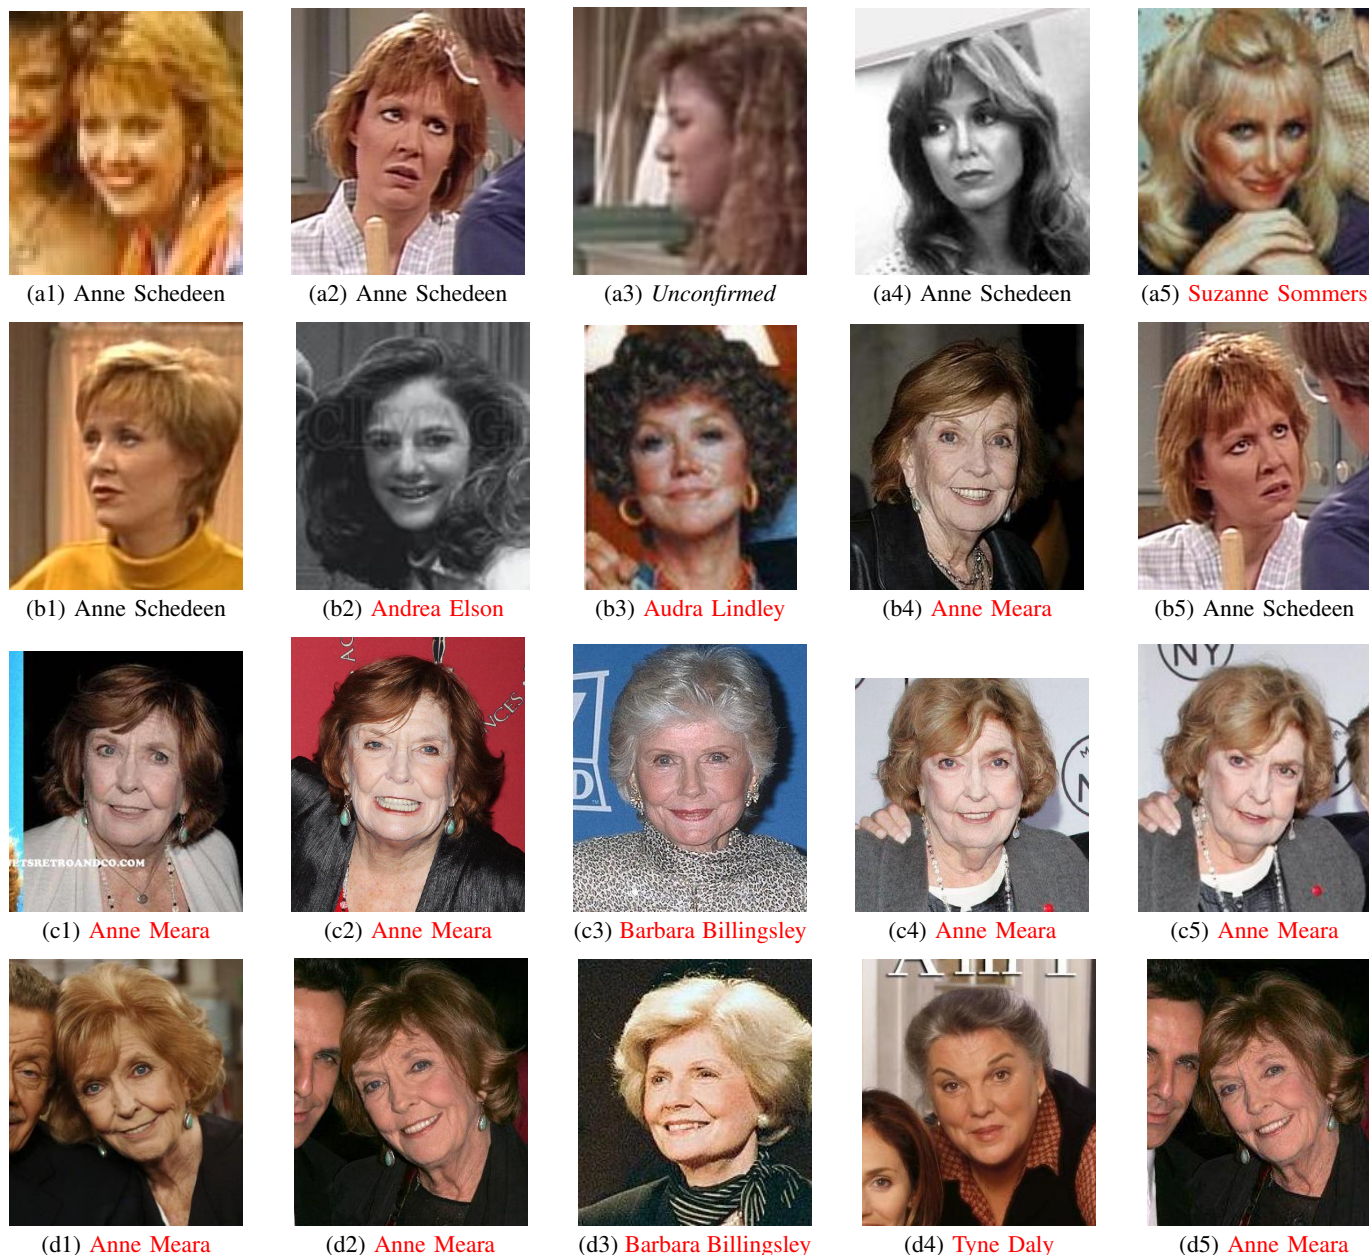

Fig. 1: First subject of VGGFace2 Age Templates (Anne Schedeen - n000654) with incorrect and correct labels. Young template #1 and #2 (first two rows), and mature template #1 and #2 (last two rows).

<sup>1</sup>[http://www.robots.ox.ac.uk/~vgg/data/vgg\\_face2/meta\\_infor.html](http://www.robots.ox.ac.uk/~vgg/data/vgg_face2/meta_infor.html)
